# Supplementary material for: Clinical Characteristics of Neurocysticercosis in a Peruvian Population-Based Epilepsy Cohort: A Descriptive Cross-Sectional Study of Baseline Clinical Intake
Source: MDPI journal article supplement (doi:10.3390/pathogens12111313), 2023-11-03

Supplemental Materials

Table S1: Description of cohort follow up

|                                                           |                         |
|-----------------------------------------------------------|-------------------------|
| No. enrolled                                              | 1975                    |
| Date range of first encounter (mm/dd/yyyy)                | 02/04/2006 – 3/13/2020  |
| Date range of baseline clinical intake visit (mm/dd/yyyy) | 01/03/2007 – 03/13/2020 |
| No. with any follow up                                    | 1862                    |
| No. with at least 1 <b>clinical follow-up</b>             | 1706                    |
| Average no. <b>clinical follow-up</b> visits (range)      | 8.4 (1-68)              |
| No. with at least 1 <b>home visit</b>                     | 1820                    |
| Average no. <b>home visits</b> (range)                    | 18.9 (1-138)            |
| Average no. years followed (range)                        | 2.9 (0-13.3)            |

Figure S1: Length of follow up in years by participants (n=1862)

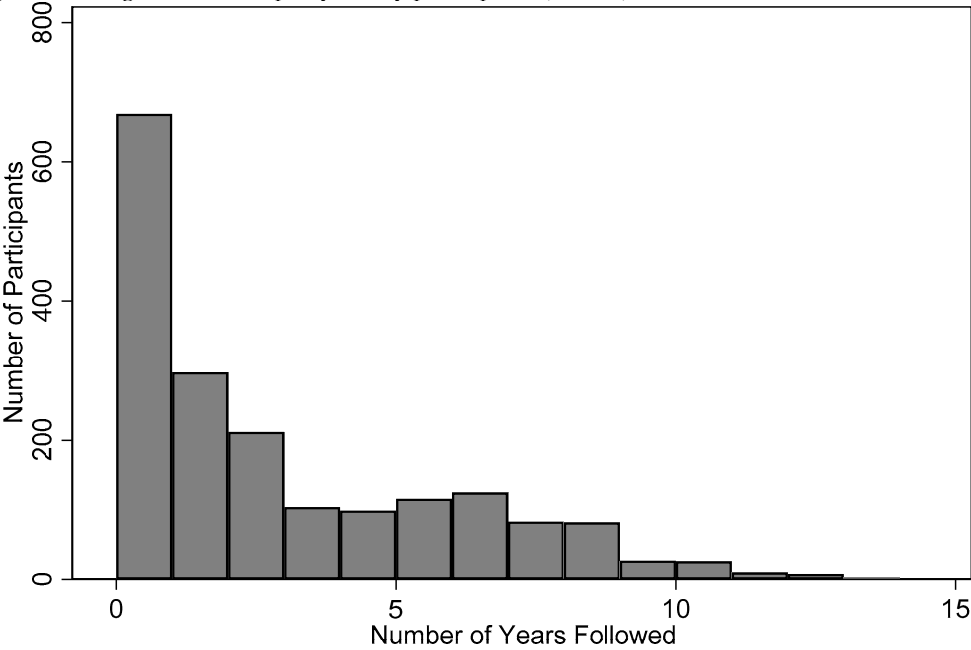

Table S2. Demographic, health, and epilepsy characteristics among the rural Peru epilepsy cohort by neurocysticercosis (NCC) diagnosis overall and stratified by age categories, 2007-2020

|                               | Total Population |             | Age Categories |            |             |            |            |             |
|-------------------------------|------------------|-------------|----------------|------------|-------------|------------|------------|-------------|
|                               | All Ages         |             | < 20 years     |            | 20-39 years |            | 40+ years  |             |
|                               | N = 1792         |             | N = 592        |            | N = 704     |            | N = 494    |             |
|                               | NCC              | Non-NCC     | NCC            | Non-NCC    | NCC         | Non-NCC    | NCC        | Non-NCC     |
|                               | N = 679          | N = 1113    | N = 151        | N = 441    | N = 275     | N = 429    | N = 253    | N = 241     |
| <b>Demographics</b>           |                  |             |                |            |             |            |            |             |
| <b>Age (years)</b>            |                  |             |                |            |             |            |            |             |
| Average with SD               | 34.3 (16.9)      | 27.0 (16.3) | *              | 13.8 (3.9) | 12.0 (4.9)  | 28.8 (5.7) | 28.8 (5.6) | 52.5 (10.6) |
| <b>Sex</b>                    |                  |             |                |            |             |            |            |             |
| Male                          | 333 (49.0)       | 545 (49.0)  |                | 75 (49.7)  | 228 (51.7)  | 138 (50.2) | 211 (49.2) | 120 (47.3)  |
| Female                        | 346 (51.0)       | 568 (51.0)  |                | 76 (50.3)  | 231 (48.3)  | 137 (49.8) | 218 (50.8) | 133 (52.6)  |
| <b>Health Characteristics</b> |                  |             |                |            |             |            |            |             |
| <b>BMI</b>                    |                  |             |                |            |             |            |            |             |
| Underweight                   | 11 (1.6)         | 32 (2.9)    | *              | 7 (4.6)    | 17 (3.9)    | 2 (0.7)    | 8 (1.9)    | 2 (0.8)     |
| Healthy                       | 189 (27.8)       | 368 (33.1)  |                | 49 (32.5)  | 192 (43.5)  | 86 (31.3)  | 109 (25.4) | 54 (21.3)   |
| Overweight or obese           | 188 (27.7)       | 281 (25.3)  |                | 25 (16.6)  | 76 (17.2)   | 70 (25.5)  | 119 (27.7) | 93 (36.8)   |
| Missing                       | 291 (42.9)       | 432 (38.8)  |                | 70 (46.4)  | 156 (35.4)  | 117 (42.6) | 193 (45.0) | 104 (41.1)  |
| <b>Substance Use</b>          |                  |             |                |            |             |            |            |             |
| Tobacco                       | 36 (9.4)         | 35 (5.3)    | *              | 2 (2.4)    | 6 (2.2)     | 21 (13.8)  | 16 (6.9)   | 13 (8.8)    |
| Alcohol                       | 163 (42.3)       | 202 (30.2)  | *              | 13 (15.5)  | 30 (11.0)   | 88 (57.5)  | 102 (43.6) | *           |
| Drugs                         | 1 (0.3)          | 5 (0.8)     |                | 0 (0.0)    | 3 (1.1)     | 1 (0.65)   | 1 (0.4)    | 0 (0.0)     |
| <b>Medical comorbidities</b>  |                  |             |                |            |             |            |            |             |
| Diabetes                      | 10 (4.6)         | 12 (3.1)    |                | 0 (0.0)    | 1 (0.6)     | 2 (2.3)    | 1 (0.8)    | 8 (9.1)     |
| Hypertension                  | 30 (12.8)        | 23 (5.8)    | *              | 0 (0.0)    | 0 (0.0)     | 3 (3.4)    | 4 (2.9)    | 27 (26.2)   |
| Dyslipidemia                  | 16 (7.4)         | 16 (4.3)    |                | 0 (0.0)    | 1 (0.7)     | 5 (6.0)    | 5 (3.8)    | 11 (12.2)   |
| Heart Disease                 | 7 (3.4)          | 6 (1.6)     |                | 0 (0.0)    | 2 (1.3)     | 2 (2.5)    | 1 (0.8)    | 5 (5.8)     |
| Psychiatric diagnosis         | 9 (2.0)          | 26 (3.5)    |                | 3 (3.2)    | 5 (1.8)     | 2 (1.2)    | 15 (5.3)   | 4 (2.2)     |
| <b>Epilepsy Risk Factors</b>  |                  |             |                |            |             |            |            |             |
| Head Trauma                   | 1 (3.6)          | 11 (14.7)   |                | 0 (0.0)    | 4 (12.9)    | 0 (0.0)    | 4 (14.3)   | 1 (9.1)     |
| FH of epilepsy                | 380 (62.0)       | 646 (64.4)  |                | 85 (63.4)  | 287 (70.7)  | 167 (65.5) | 245 (63.3) | 128 (57.1)  |

|                                            |            |            |   |            |            |   |            |            |            |            |
|--------------------------------------------|------------|------------|---|------------|------------|---|------------|------------|------------|------------|
| History of neurosurgery                    | 3 (0.5)    | 8 (0.8)    |   | 0 (0.0)    | 3 (0.8)    |   | 2 (0.8)    | 1 (0.3)    | 1 (0.4)    | 4 (1.8)    |
| Developmental abnormality                  | 51 (10.0)  | 136 (15.0) | * | 11 (8.7)   | 67 (17.2)  | * | 20 (10.0)  | 59 (17.0)  | 20 (10.9)  | 10 (5.9)   |
| <b>Epilepsy Characteristics</b>            |            |            |   |            |            |   |            |            |            |            |
| <b>Active epilepsy*</b>                    |            |            |   |            |            |   |            |            |            |            |
| Active                                     | 572 (88.0) | 971 (91.4) |   | 138 (93.2) | 401 (94.6) |   | 240 (90.2) | 385 (94.4) | 194 (82.8) | 194 (80.0) |
| Inactive                                   | 78 (12.0)  | 92 (8.7)   | * | 10 (6.8)   | 23 (5.4)   |   | 26 (9.8)   | 23 (5.6)   | 42 (17.8)  | 46 (20.0)  |
| <b>Age of Onset</b>                        |            |            |   |            |            |   |            |            |            |            |
| < 18 years                                 | 338 (57.6) | 661 (69.3) |   | 122 (96.1) | 359 (97.6) |   | 138 (57.7) | 228 (59.8) | 78 (35.3)  | 74 (36.1)  |
| 18 or older                                | 249 (42.4) | 293 (30.7) | * | 5 (3.9)    | 9 (2.5)    |   | 101 (42.3) | 153 (40.2) | 143 (64.7) | 131 (63.9) |
| <b>Duration of Epilepsy</b>                |            |            |   |            |            |   |            |            |            |            |
| < 2 years                                  | 111 (18.8) | 207 (21.5) | * | 45 (34.9)  | 129 (34.4) |   | 44 (18.4)  | 47 (12.3)  | 22 (9.9)   | 30 (14.6)  |
| 2-5 years                                  | 86 (14.6)  | 211 (21.9) |   | 35 (27.1)  | 112 (29.9) |   | 31 (13.0)  | 72 (18.9)  | 20 (9.0)   | 27 (13.2)  |
| 6-10 years                                 | 82 (13.9)  | 132 (13.7) |   | 31 (24.0)  | 74 (19.7)  |   | 29 (12.1)  | 47 (12.3)  | 22 (9.9)   | 11 (5.4)   |
| 11-15 years                                | 69 (11.7)  | 112 (11.6) |   | 14 (10.9)  | 41 (10.9)  |   | 43 (18.0)  | 59 (15.5)  | 12 (5.4)   | 12 (5.4)   |
| 16-20 years                                | 60 (10.2)  | 91 (9.5)   |   | 2 (1.6)    | 16 (4.3)   |   | 38 (15.9)  | 63 (16.5)  | 20 (9.0)   | 12 (5.9)   |
| 20 years                                   | 182 (30.9) | 210 (21.8) |   | 2 (1.6)    | 3 (0.8)    |   | 54 (22.6)  | 93 (24.4)  | 126 (56.8) | 113 (55.1) |
| <b>Seizure types by history</b>            |            |            |   |            |            |   |            |            |            |            |
| Generalized                                | 112 (21.3) | 250 (28.1) | * | 23 (19.3)  | 111 (31.9) | * | 47 (21.9)  | 82 (24.2)  | 42 (21.9)  | 56 (28.1)  |
| Focal                                      | 397 (75.5) | 623 (70.0) |   | 90 (75.6)  | 228 (65.5) |   | 163 (75.8) | 252 (74.3) | 144 (75.0) | 139 (69.9) |
| Indeterminate                              | 17 (3.2)   | 17 (2.0)   |   | 6 (5.0)    | 9 (2.6)    |   | 5 (2.3)    | 5 (1.5)    | 6 (3.1)    | 4 (2.0)    |
| <b>Reported any current/past ASM usage</b> |            |            |   |            |            |   |            |            |            |            |
| Yes                                        | 134 (19.7) | 279 (25.1) | * | 29 (19.2)  | 106 (24.0) |   | 54 (10.6)  | 114 (26.6) | 51 (20.2)  | 59 (24.5)  |

\* Indicates P-values < 0.05

NB: percentages are reported among available data

**Table S3. Demographic and epilepsy characteristics among the epilepsy cohort by neurocysticercosis (NCC) diagnosis overall and stratified by active epilepsy, 2007-2020**

|                                                 | Total       |             | Active Epilepsy |             | Inactive Epilepsy |         | Missing     |             |   |             |             |
|-------------------------------------------------|-------------|-------------|-----------------|-------------|-------------------|---------|-------------|-------------|---|-------------|-------------|
|                                                 | N = 1792    |             | N = 1543        |             | N = 170           |         | N = 79      |             |   |             |             |
|                                                 | NCC         | Non-NCC     | NCC             | Non-NCC     | NCC               | Non-NCC | NCC         | Non-NCC     |   |             |             |
|                                                 | N = 679     | N = 1113    | N = 572         | N = 971     | N = 78            | N = 92  | N = 29      | N = 50      |   |             |             |
| <b>Demographics</b>                             |             |             |                 |             |                   |         |             |             |   |             |             |
| Age                                             | 34.3 (16.9) | 27.0 (16.3) |                 | 32.9 (16.4) | 26.0 (15.6)       |         | 41.9 (18.5) | 36.9 (19.6) |   | 42.3 (16.4) | 29.0 (16.8) |
| Sex (male)                                      | 333 (49.0)  | 545 (49.0)  |                 | 276 (48.3)  | 475 (48.9)        |         | 43 (55.1)   | 41 (44.6)   |   | 14 (48.3)   | 29 (58.0)   |
| <b>Epilepsy Characteristics</b>                 |             |             |                 |             |                   |         |             |             |   |             |             |
| <b>Age of Onset</b>                             |             |             |                 |             |                   |         |             |             |   |             |             |
| 18 or older                                     | 249 (42.4)  | 293 (30.7)  | *               | 212 (42.4)  | 264 (31.1)        | *       | 30 (41.1)   | 25 (31.7)   |   | 7 (50.0)    | 4 (15.4)    |
| <b>Duration of Epilepsy</b>                     |             |             |                 |             |                   |         |             |             |   |             |             |
| < 2 years                                       | 111 (18.8)  | 207 (21.5)  | *               | 110 (21.9)  | 203 (23.7)        | *       | 1 (1.4)     | 3 (3.8)     |   | 0 (0.0)     | 1 (3.7)     |
| 2-5 years                                       | 86 (14.6)   | 211 (21.9)  |                 | 82 (16.3)   | 202 (23.6)        |         | 4 (5.5)     | 8 (10.0)    |   | 0 (0.0)     | 1 (3.7)     |
| 6-10 years                                      | 82 (13.9)   | 132 (13.7)  |                 | 70 (13.9)   | 117 (13.7)        |         | 10 (13.7)   | 11 (13.8)   |   | 2 (14.3)    | 4 (14.8)    |
| 11-15 years                                     | 69 (11.7)   | 112 (11.6)  |                 | 57 (11.3)   | 94 (11.0)         |         | 10 (13.7)   | 13 (16.3)   |   | 2 (14.3)    | 5 (18.5)    |
| 16-20 years                                     | 60 (10.2)   | 91 (9.5)    |                 | 52 (10.3)   | 78 (9.1)          |         | 6 (8.2)     | 10 (12.5)   |   | 2 (14.3)    | 3 (11.1)    |
| 20+ years                                       | 182 (30.9)  | 210 (21.8)  |                 | 132 (26.2)  | 162 (18.9)        |         | 42 (57.5)   | 35 (43.8)   |   | 8 (57.1)    | 13 (48.2)   |
| <b>Seizure types by history</b>                 |             |             |                 |             |                   |         |             |             |   |             |             |
| Generalized                                     | 112 (21.3)  | 250 (28.1)  | *               | 76 (17.0)   | 203 (25.6)        | *       | 36 (47.4)   | 45 (49.5)   |   | 0           | 1           |
| Focal                                           | 397 (75.5)  | 623 (70.0)  |                 | 357 (79.7)  | 574 (72.4)        |         | 39 (51.3)   | 44 (48.4)   |   | 1           | 1           |
| Indeterminate                                   | 17 (3.2)    | 18 (2.0)    |                 | 15 (3.4)    | 16 (2.0)          |         | 1 (1.3)     | 2 (2.2)     |   | 1           | 0           |
| <b>EEG Result</b>                               |             |             |                 |             |                   |         |             |             |   |             |             |
| Normal                                          | 35 (46.7)   | 60 (36.8)   |                 | 33 (45.8)   | 53 (35.6)         |         | 0           | 1           |   |             |             |
| Non-specific abnormality                        | 20 (26.7)   | 49 (30.1)   |                 | 20 (27.8)   | 46 (30.9)         |         | 0           | 1           |   |             |             |
| Focal epileptiform                              | 12 (16.0)   | 21 (12.9)   |                 | 12 (16.7)   | 18 (12.1)         |         | 0           | 0           |   |             |             |
| Generalized epileptiform                        | 3 (4.0)     | 16 (9.8)    |                 | 2 (2.8)     | 16 (10.7)         |         | 0           | 0           |   |             |             |
| Epileptiform uncertain focal versus generalized | 5 (6.7)     | 7 (10.4)    |                 | 5 (6.9)     | 16 (10.7)         |         | 0           | 0           |   |             |             |
| <b>Reported current/past ASM usage</b>          |             |             |                 |             |                   |         |             |             |   |             |             |
| Yes                                             | 134 (19.7)  | 279 (25.1)  |                 | 131 (22.9)  | 266 (27.4)        |         | 0           | 3 (3.3)     |   | 3 (10.3)    | 10 (20.0)   |
| <b>ASM prescribed at baseline</b>               |             |             |                 |             |                   |         |             |             |   |             |             |
| Yes                                             | 539 (87.4)  | 859 (87.7)  |                 | 539 (97.6)  | 859 (99.6)        |         | NA          | NA          |   | 0           | 0           |
| <b>Cysticercosis Diagnostic Serologies</b>      |             |             |                 |             |                   |         |             |             |   |             |             |
| <b>EITB assay results</b>                       |             |             |                 |             |                   |         |             |             |   |             |             |
| 1 or more                                       | 359 (56.1)  | 234 (23.9)  | *               | 295 (54.9)  | 192 (22.6)        | *       | 49 (63.6)   | 31 (35.2)   | * | 15 (57.7)   | 11 (27.5)   |
| <b>Antigen ELISA results</b>                    |             |             |                 |             |                   |         |             |             |   |             |             |

|          |           |          |   |           |          |          |          |          |         |
|----------|-----------|----------|---|-----------|----------|----------|----------|----------|---------|
| Positive | 41 (41.0) | 8 (14.0) | * | 35 (39.8) | 7 (14.9) | 5 (50.0) | 1 (14.3) | 1 (50.0) | 0 (0.0) |
|----------|-----------|----------|---|-----------|----------|----------|----------|----------|---------|

\* Indicates P-values < 0.05

NB: percentages are reported among available data

Table S4. Enzyme-linked immunoelectrotransfer blot (EITB) for *Taenia solium* results by any NCC and type of NCC diagnosed by computed tomography (CT) scan at baseline clinical intake, 2007-2020

|                                   | Calcified lesions,<br>only<br>n = 550 | Any active cysts<br>n = 90 | No NCC<br>n = 979 |
|-----------------------------------|---------------------------------------|----------------------------|-------------------|
| <b>Positive Western Blot (WB)</b> |                                       |                            |                   |
| Any bands                         | 291 (53.1)                            | 67 (74.4)                  | 234 (23.9)        |
| <b>Categorical WB</b>             |                                       |                            |                   |
| No bands                          | 258 (46.9)                            | 23 (25.6)                  | 745 (76.1)        |
| 1-2 bands                         | 86 (15.6)                             | 9 (10.0)                   | 110 (11.2)        |
| 3 + bands                         | 206 (37.5)                            | 58 (64.4)                  | 124 (12.7)        |
| <b>Full WB results</b>            |                                       |                            |                   |
| No bands                          | 258 (46.9)                            | 23 (25.6)                  | 745 (76.1)        |
| 1 band                            | 47 (8.6)                              | 3 (3.3)                    | 64 (6.5)          |
| 2 bands                           | 46 (8.4)                              | 7 (7.8)                    | 51 (5.2)          |
| 3 bands                           | 114 (20.7)                            | 20 (22.2)                  | 96 (9.8)          |
| 4 bands                           | 26 (4.7)                              | 6 (6.7)                    | 9 (0.9)           |
| 5 bands                           | 11 (2.0)                              | 3 (3.3)                    | 5 (0.5)           |
| 6 bands                           | 11 (2.0)                              | 5 (5.6)                    | 3 (0.3)           |
| 7 bands                           | 37 (6.7)                              | 23 (25.6)                  | 6 (0.6)           |

All differences in proportions for WB results by NCC categories were statistically significant ( $P < 0.0001$ )

Figure S2: Stacked Bar Plot of Cumulative Percentages by NCC Imaging Categories

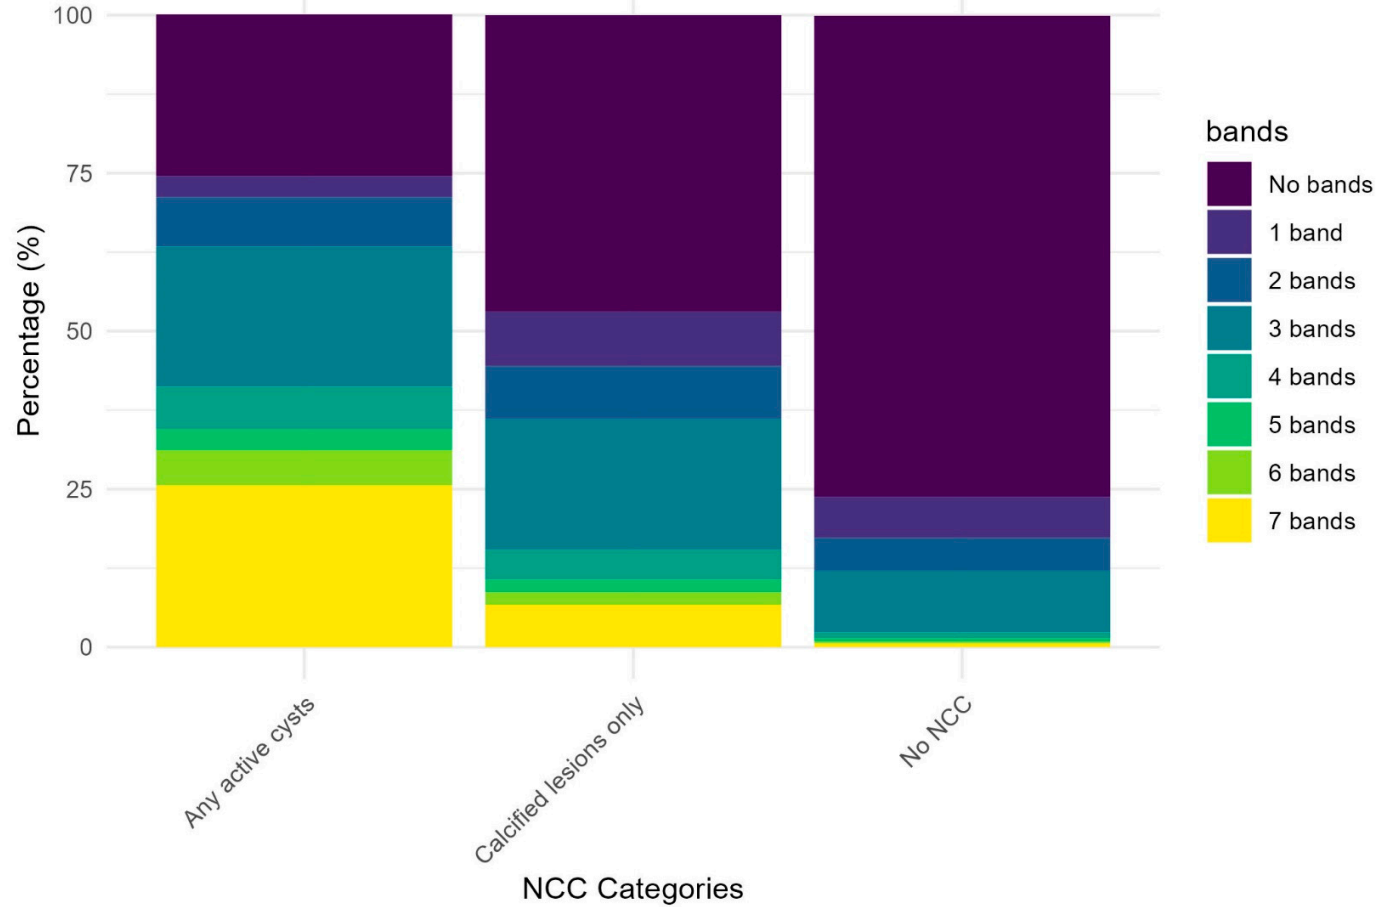

Supplement: s1 [file s1]
